# Supplementary material for: The impact of skeletal muscle index at the third lumbar spine on nosocomial deterioration and short-term prognosis in acute pancreatitis: a retrospective observational study
Source: PeerJ. 2024 Apr 30;12:e17283. doi: 10.7717/peerj.17283 (PMC11067894; doi:10.7717/peerj.17283)
Supplement: Supplemental Information 1 [file peerj-12-17283-s001.xlsx]

## Sheet: Survival Group
Number	Age (years)	BMI (kg/m2)	Duration of anti-inflammatory drug usage (days)	Admission APACHE II Score	Gender	Surgery	Mechanical Ventilation	Renal Replacement Therapy	Etiology (Cholangiogenic: 1, Alcoholic: 2, Hyperlipidemic: 3)	MCTSI Score	Balthazar CT Grade	L3-SMI (cm2/m2)
1	50.58	23.3	15.74	17.61	1	0	0	0	1	6.18	3.44	42.77
2	51.52	26.84	17.97	13.1	1	0	1	0	2	4.77	3.32	43.24
3	46	22.27	28.93	12.93	1	1	1	0	3	5.25	3.17	42.29
4	51.92	22.55	33.8	12.34	0	1	1	1	2	5.58	2.77	41.64
5	49.34	24.11	23.71	10.89	1	0	1	0	2	4.96	2.55	44.27
6	57.2	27.79	23.67	5.14	1	0	1	1	3	4.51	3.24	46.17
7	60.89	21.78	22.32	21.13	1	1	1	0	1	5.89	3.57	45.76
8	57.62	25.89	19.31	13.76	1	0	1	0	2	5.51	2.84	39.5
9	63.61	22.2	28.05	16.54	0	0	1	1	3	5.43	3.47	46.65
10	54.8	27.17	27.66	9.58	0	0	1	0	2	4.95	3	47.95
11	59.16	25.27	21.7	18.71	1	0	1	0	2	5.07	2.92	37.05
12	54.86	23.49	29.75	17.93	1	1	1	0	2	5.12	2.82	43.85
13	60.35	24.23	17.42	14.52	1	0	1	0	2	5.58	2.97	47.36
14	59.16	26.47	23.71	12.39	1	0	1	0	2	5.69	3.37	43.2
15	58.09	23.88	20.13	12.13	1	0	1	0	1	4.56	3.4	44.94
16	48.49	25.9	27.3	11.43	1	0	0	0	3	6.1	3.14	35.82
17	54.82	19.07	19.88	12.91	1	0	1	0	3	5.48	3	40.57
18	56.49	30.19	33.17	13.13	0	0	1	0	2	4.88	3.63	38.59
19	55.24	24.33	21	9.15	1	0	1	0	3	5.5	3.06	49.78
20	60.18	25.24	26.52	3.28	0	0	1	0	3	5.74	3.54	44.45
21	61.64	21.99	22.54	19.72	1	0	1	0	1	4.71	3.07	41.74
22	52.01	25.75	17.05	13.16	1	0	1	0	1	5.65	3	48.7
23	57.17	24.86	31.93	10.2	1	1	1	0	3	4.44	2.72	44.45
24	62.85	21.77	23.94	16.8	0	0	1	0	1	4.67	3.02	51.37
25	61.56	22.63	24.61	19.09	1	0	1	0	3	5.76	3.54	37.06
26	53.48	21.13	34.97	17.69	0	0	1	1	1	4.92	3.28	37.58
27	48.18	27.68	25.37	5.67	1	0	1	1	1	6.34	3.56	37.92
28	61.8	26.09	20.6	17.14	0	1	1	0	3	5.01	3.88	37.53
29	70.1	24.65	18.69	24.12	0	1	1	1	2	5.78	3.98	43.52
30	44.76	27.07	24.39	11.68	0	0	1	0	3	5.65	3.68	48.4
31	51.08	21.9	27.51	13.2	0	0	1	0	2	4.9	3.12	40.48
32	57	19.21	24.19	12.13	0	0	1	0	3	5.5	3.28	41.73
33	64.57	23.82	18.86	16.03	1	0	1	0	1	4.22	3.05	48.7
34	43.33	23.36	29.44	16.2	1	1	1	0	1	6.02	3.36	40.15
35	53.88	27.44	24.84	8.48	1	0	1	0	3	4.94	2.94	45.12
36	57.1	19.47	19.32	16.08	1	0	1	0	2	5.95	3.9	48.72
37	43.68	23.32	29.26	3.86	1	0	1	0	1	4.56	3.76	38.31
38	55.35	23.02	22.15	1.63	1	0	1	1	2	5.31	3	45.25
39	49.93	24.52	26.97	3.49	0	0	1	0	3	5.54	3.66	43.41
40	65.03	23.98	16.28	14.63	1	1	1	0	3	6.05	3.69	52.77
41	60.68	24.63	30.58	16.14	1	1	1	0	3	6.48	3.52	41.48
42	46.33	25.27	23.51	11.67	1	0	1	0	3	5.93	2.99	36.15
43	71.42	29.07	13.55	21.89	1	1	1	0	1	5.05	3.44	46.37
44	56.23	20.53	23.92	13.87	1	0	1	0	2	6	2.85	45.12
45	55.14	30.86	17.36	3.36	0	0	1	0	3	4.81	3.59	46.46
46	52.07	26.36	22.1	17.69	1	0	0	0	1	5.7	3.27	45.74
47	56.66	22.71	21.53	11.78	1	0	0	0	2	5.16	3.21	47.45
48	50.26	26.56	20.14	7.48	1	0	1	1	3	5.44	3.12	38.37
49	56.15	26.49	28.27	14.95	0	1	1	0	2	5.32	2.88	39.63
50	50.57	24	25.49	13.62	1	1	1	0	2	4.77	3.23	40.14
51	65.77	23.22	23.61	13.79	0	1	1	0	1	5.73	3.19	40.28
52	55.62	26.89	28.27	8.77	1	1	1	1	3	4.43	3.98	39.11
53	48.07	24.78	27.35	4.06	0	0	1	0	3	4.96	3.52	43.41
54	51.03	23.87	29.69	18.72	0	1	1	0	2	5.69	3.88	42.01
55	54.47	27.26	21.28	14.49	0	1	1	0	2	6.22	3.51	43.94
56	55	23.62	17.93	17	0	0	1	0	3	5.06	3.67	42.93
57	69.13	25.28	26.61	16	0	0	1	0	1	5.33	2.68	42.77
58	53.51	23.55	35.13	10.65	1	0	1	0	1	6.73	3.33	35.99
59	53.19	24.39	20.24	13	0	1	0	0	2	5.07	3.15	46.36
60	60.08	25.4	14.87	16.13	0	0	1	0	2	5.92	2.78	44.5
61	60.83	24.32	16.15	9.53	1	1	0	0	2	5.4	3.68	36.77
62	63.34	21.94	19.95	10.65	1	0	1	0	2	4.89	3.08	46.18
63	67.18	25.08	25.09	10.61	1	1	1	1	2	4.73	3.4	34.93
64	54.13	22.93	17.51	3.7	1	1	1	0	2	5.5	3.95	46.34
65	58.29	19.77	28.27	14.88	0	0	1	0	1	5.76	3.05	39.54
66	55.44	23.04	23.25	17.43	1	0	1	0	1	4.64	3.01	40.24
67	56.05	19.47	17.66	16.21	1	0	1	0	3	5.34	2.78	41.89
68	56.47	25.75	13.74	8.26	1	0	0	1	3	5.87	3.92	39.85
69	61.24	22.75	27.63	13.62	1	1	1	0	2	4.14	3.11	43.03
70	67.48	24.5	29.88	5.27	0	1	1	0	1	4.75	3.28	42.84
71	67.97	24.78	14.74	10.34	0	1	1	0	2	4.58	3.85	48.73
72	55.98	28.27	19.9	13.36	0	0	0	0	2	5.6	3.17	53.86
73	54.28	24.93	30.12	14.76	0	0	1	0	3	5.57	3.05	40.55
74	51.4	21.78	18.63	17.38	1	0	1	0	1	5.65	3.44	45.06
75	54.52	23.11	30.31	20.88	0	0	1	0	1	4.73	3.2	39.72
76	66.62	21.09	27.14	16.35	1	0	0	0	3	4.67	2.45	41.41
77	59.45	27.45	25.6	16.37	1	0	0	0	1	5.19	3.46	39.89
78	46.16	21.85	10.94	8.84	0	1	1	0	1	5.45	3.73	46.6
79	56.09	23.63	21.08	12.39	0	0	1	0	1	5.75	3.45	44.88
80	60.2	25.05	22.2	8.69	1	0	1	0	1	5.95	2.19	50.98
81	53.5	24.19	15.55	16.37	0	1	1	0	1	5.77	3.66	32.52
82	47.72	23.02	26.3	16.1	1	0	0	0	3	5.01	3.06	43.43
83	58.32	25.67	20.01	13.93	1	0	0	0	1	5.52	3.08	45.15
84	60.4	26.85	18.73	16.34	0	0	1	0	2	5.37	3.13	34.67
85	51.15	22.84	26.25	11.98	1	0	1	0	1	5.96	3.42	37.23
86	55.93	26.65	40.53	13.81	0	0	1	0	2	5.48	3.56	49.1
87	63.19	26.53	27.91	17.28	1	0	1	1	1	5.81	2.78	30.87
88	52.45	23.54	28.13	20.36	0	0	1	0	2	4.93	2.78	45.9
89	59.15	23.54	12.13	10.46	0	0	1	0	2	4.87	4.19	45.1
90	55.98	20.61	26.5	13.85	0	0	1	0	2	5.63	3.37	44.29
91	52.54	22.21	29.06	18.12	1	0	1	0	3	5.2	3.19	37.51
92	54.81	24.54	21.01	18.7	0	0	1	0	1	6.09	2.99	43.69
93	51.7	20.64	18.89	0.37	0	1	0	0	2	5.39	3.47	38.28
94	64.75	20.86	27.24	4.66	0	0	1	0	2	4.76	3.42	43.43
95	53.81	25.68	21.16	13.99	1	0	0	0	1	4.72	2.96	39.37
96	59.22	17.75	26.07	12.54	0	0	1	1	3	4.74	2.95	42.65
97	54.71	24.2	18.54	11.83	1	1	0	0	2	4.52	3.09	38.86
98	57	23.26	24.87	8.14	0	0	1	0	2	5.27	3.33	48.16
99	55.01	26.4	17.11	14.63	1	1	1	0	3	5.56	4.11	37.54
100	62.89	23.66	16	14.9	1	0	1	0	1	3.96	3.09	44.56
101	57.7	26.7	15.68	16.21	0	0	0	0	3	5.1	3.47	44.07
102	52.27	25.26	24.01	2.55	1	0	1	0	2	5.58	2.97	38.12
103	57.14	22.27	16.96	10.71	1	0	1	1	1	5.54	2.61	48.23
104	55.99	21.17	14.51	16.43	0	0	1	0	1	6.36	3.94	41.68
105	56.32	29.48	28.88	11.11	1	0	1	1	3	6.17	2.65	45.64
106	57.78	24.71	23	15.31	1	0	0	0	2	4.63	3.7	43.28
107	58.81	27.97	22.37	15.49	0	0	1	0	1	4.8	3.98	46.63
108	46.98	19.89	19.93	12.95	1	0	1	0	3	5.51	3.61	38.17
109	45.91	22.68	25.68	14.25	0	0	0	0	2	5.72	3.24	39.05
110	66.85	28.26	27.34	13.04	1	0	1	0	2	5.59	3.37	34.19
111	61.01	22.92	21.39	19.39	0	0	1	0	1	5.06	2.8	46.49
112	55.35	25.64	28.73	10.21	0	0	1	1	3	5.07	2.91	39.46
113	59.15	23.71	30.85	13.44	0	0	1	0	1	3.99	2.84	43.63
114	53.73	23.38	15.07	13.04	1	1	1	0	2	5.35	2.99	43.81
115	57.16	23.2	25.39	7.45	0	0	1	0	3	4.67	3.33	42.29
116	52.32	22.85	22.91	10.82	0	0	1	0	3	6.28	3.75	47.58
117	53.93	19.34	33.78	7.47	0	1	1	0	1	4.96	3.39	38.21
118	57.75	22.94	27.06	3.94	1	0	0	0	2	4.53	3.48	41.89
119	55.04	23.99	26.92	7.54	0	1	1	0	1	6.01	2.25	41.91
120	49.6	25.08	19.36	5.94	1	0	1	0	1	5.19	3.59	43.79
121	57.53	23.48	17.32	12.88	1	0	1	0	2	5.37	3.07	34.8
122	58.58	20.77	25.43	15.7	0	0	0	0	2	5.11	2.85	37.88
123	56.56	23.94	14.43	18.1	0	0	1	0	1	6.08	3.88	43
124	52.65	26.1	24.93	11.47	1	1	1	0	1	5.11	3.39	38.91
125	50.39	21.73	18.36	5.76	0	0	1	0	3	4.27	2.98	39.54
126	47.2	24.58	14.28	15.52	1	1	1	0	2	4.67	3.1	44.49
127	47.98	24.21	18.92	21.79	0	0	0	0	1	4.31	2.62	41.69
128	51.11	24.53	29.81	21.31	0	0	1	0	1	4.81	3.89	48.07
129	52.09	28.64	20.91	15.31	1	1	1	1	2	5.5	3.69	46.1
130	51.05	21.91	24.05	13.49	1	0	1	0	3	4.55	3.21	42.3
131	54.82	22.78	28.96	11.48	1	0	1	0	3	4.86	3.43	41.36
132	64.87	27.69	26.53	16.08	1	1	1	0	1	5.65	3.23	37.45
133	62.66	29.65	23.25	15.56	0	0	1	0	2	5.61	3	45.27
134	55.85	26.96	21.27	18.23	1	1	1	0	2	5.68	3.76	42.29
135	55.07	28.43	22.39	16.27	1	1	0	0	3	5.47	3.63	46.97
136	53.64	24.11	15.31	9.63	1	0	1	0	2	6.59	3.01	42.97
137	59.12	27.88	23.9	10.74	1	0	1	0	1	5.8	3.1	45.74
138	65.57	23.94	22.49	9.33	0	1	0	0	3	6.01	3.3	36.05
139	61.4	19.62	11.35	15.12	0	0	1	0	1	4.92	3.71	42.49
140	56.84	23.79	17.39	13.1	0	1	1	1	2	4.51	2.65	41.81
141	51.53	24.32	15.85	4.21	1	1	1	1	2	4.91	3.78	43.46
142	57.37	24.5	19.83	11.4	1	1	1	1	1	4.8	3.49	44.76
143	64.56	19.45	23.18	17.61	1	0	0	1	2	4.54	3.15	39.8
144	47.01	20.84	28.62	13.59	0	0	1	0	3	5.34	3.35	46.8
145	62.8	21.51	34.6	17.86	0	0	1	0	3	5.64	2.75	43.14
146	59.9	24.7	17.65	6.49	1	0	1	1	1	6.07	3.29	43.93
147	54.68	26.16	24.1	12.12	1	0	1	0	3	5.35	3.29	45.33
148	52.7	25.29	26.46	12.7	0	1	1	0	2	5.14	3.7	40.02
149	61.19	23.04	25.11	13.84	1	0	0	0	2	5.3	3.6	38.65
150	53.12	24.47	23.89	17.65	0	1	1	1	3	5.2	3.24	35.58
151	50.81	27.52	22.17	7.72	0	0	0	0	2	5.64	3.42	36.43
152	53.44	27.92	23.21	22.07	1	0	1	0	2	5.48	3.3	43.46
153	55.19	22.06	24	8.71	1	0	1	0	2	5.07	3.16	49.56
154	49.01	21.9	26.4	20.84	1	0	1	0	2	4.65	3.29	46.45
155	57.25	27.13	16.9	9.45	0	1	1	0	1	4.51	3.22	38.3
156	58.51	24.7	24.63	10.97	1	0	1	0	3	6.25	3.17	45.96
157	65	23.54	21.55	22.81	1	1	0	0	1	6.54	2.76	45.49
158	56.51	24.01	23.9	21.1	0	1	1	0	3	4.08	3.63	41.13
159	61.48	24.8	21.91	15.06	1	1	1	0	1	3.84	3.44	34.24
160	69.85	25.18	28.36	14.31	1	0	1	0	2	4.98	3.68	39.93
161	57.4	20.5	22.13	7.25	1	0	1	0	2	4.78	3.11	46.63
162	49.66	22.57	27.97	13.08	1	0	1	0	1	4.63	2.96	38.79
163	53.89	22.63	24.88	10.45	1	1	1	0	1	4.73	3.58	37.87
164	52.53	22.37	23.55	8.95	1	0	1	0	1	5.13	2.42	44.43
165	62.03	26.26	23.57	18.75	1	0	1	0	2	5.5	3.49	49.57

## Sheet: Death Group
Number	Age (years)	BMI (kg/m2)	Duration of anti-inflammatory drug usage (days)	Admission APACHE II Score	Gender	Surgery	Mechanical Ventilation	Renal Replacement Therapy	Etiology (Cholangiogenic: 1, Alcoholic: 2, Hyperlipidemic: 3)	MCTSI Score	Balthazar CT Grade	L3-SMI (cm2/m2)
1	58.02	23.27	35.09	16.41	1	0	1	1	3	7.77	3.77	38.82
2	64.96	26.38	33.64	16.43	1	0	1	0	3	7.19	3.91	38.06
3	48.71	23.52	25.31	13.91	0	0	1	0	1	6.65	3.81	40.6
4	52.89	19.76	21.49	12.37	1	0	1	1	3	7.07	3.94	39.6
5	62	19.27	34.66	19.7	1	0	1	0	3	7.03	3.37	38.86
6	67.2	23.84	34.36	6.28	1	0	1	0	2	6.03	4.69	31.49
7	49.98	25.11	31.19	13.67	1	0	1	0	2	7.26	3.1	35.75
8	61	22.01	22.88	7.72	0	1	1	0	1	7.95	3.55	37.67
9	55.85	27.89	26.44	11	1	0	1	1	1	5.75	3.63	39.89
10	50.09	30.24	17.82	17.78	0	1	1	0	2	7.21	3.66	39.88
11	58.13	22.09	33.85	15.92	0	0	0	1	2	6.48	3.33	44.02
12	63.32	24.34	28.28	17.32	1	0	1	0	2	6.04	3.44	40.78
13	52.48	22.82	35.54	4.29	0	0	1	1	3	5.88	3.73	35.5
14	49.17	25.17	28.14	15.71	1	0	1	0	2	6.87	4.23	42.51
15	51.53	21.5	29.63	10.52	1	0	1	1	3	5.48	4.24	38.58
16	59.87	25.6	28.88	13.75	1	1	1	0	2	5.86	3.48	40.37
17	62.86	26.5	32.33	19.31	1	1	1	1	2	5.1	3.58	41.26
18	52.8	26.51	41.48	19.68	1	1	1	0	1	5.59	3.63	39.17
19	57.45	26.21	38.28	13.66	0	1	1	1	2	6.7	3.22	40.59
20	58.39	22.58	29.86	10.23	1	0	1	0	1	6.95	3.76	37.76
21	66.22	23.05	28.9	19.23	1	0	1	1	2	6.73	3.96	42.6
22	61.79	25.93	28.94	23.63	1	0	1	0	3	6.67	4.23	43.18
23	68.02	22.76	25.45	2.41	0	1	1	0	3	6.75	4.31	41.09
24	64.51	22.95	32.88	9.82	1	0	1	0	2	5.78	2.94	34.97
25	54.02	22.1	25.85	19.92	1	0	1	0	2	4.94	4.13	38.47
26	49.89	26.29	33.13	9.91	1	0	1	1	2	6.77	3.12	38.41
27	59.61	23.35	37.11	15.16	1	1	1	1	2	5.94	4.5	40.11
28	57.03	29.49	24.99	8.93	0	1	1	0	1	6.18	3.21	39.09
29	59.75	21.33	31.23	12.27	0	0	1	1	3	7.57	4.34	44.81
30	49.77	19.49	22.69	15.48	0	0	1	0	1	5.81	5	41.59
31	53.28	27.91	26.45	11.61	1	0	1	1	2	6.65	3.25	41.13
32	55.54	25.18	28.39	4.35	1	0	1	0	2	6.37	3.7	39.58
33	59.08	21.59	19.31	23.21	0	0	1	1	1	6.39	3.69	37.15
34	65.65	22.78	28.66	14.04	1	1	1	0	1	5.78	4.92	37.83
35	53.22	25.98	27.76	20.53	1	1	1	0	3	5.52	4.45	45.94
36	55.58	25.91	18.31	19.06	1	1	1	0	1	6.19	3.25	38.04
37	58.48	24.48	28	6.28	1	0	1	0	1	5.31	3.94	41.57
38	66.22	28.02	33.01	11.08	1	0	1	1	3	6.13	3.91	44.78
39	50.69	23.82	34.3	24.62	1	0	1	0	2	5.85	3.7	37.7
40	59.34	26.06	20.88	7.62	1	0	1	0	1	5.63	3.7	40.7
41	55.74	23.71	30.37	6.67	0	0	1	1	3	6.98	3.82	39.62
42	65.4	25.99	31.13	15.41	1	0	1	0	2	7.69	3.42	41.29
43	58.08	28.54	36.2	10.79	0	0	1	0	2	6.45	3.44	37.76
44	56.32	25.11	24.35	14.38	1	1	1	1	1	7.16	3.24	39.53
45	67.1	24.77	26.28	17.55	1	0	1	1	3	6.67	3.73	42.74
46	54.41	24.2	30.11	17.96	1	0	1	0	1	7.09	3.7	44.19
47	54.71	23.82	33.08	12.34	0	0	1	1	2	6.9	4.51	42.32
48	58.44	25.26	34.48	16.44	1	1	1	0	2	6.85	3.72	40.22
49	59.51	27.35	28.9	12.57	1	0	1	0	2	5.96	3.58	37.3
50	58.82	21.77	16.28	10.76	1	0	1	0	1	6.71	4.11	41.39
51	61.2	30.05	29.14	17.42	0	0	1	0	3	6.55	3.13	41.62
52	62.16	27.01	27.95	16.37	0	0	1	0	3	5.79	4.21	40.95
53	61.62	20.6	18.78	18.06	1	0	1	1	2	5.9	3.53	43.12
54	59.59	22.76	28.02	17.44	0	1	1	0	3	5.53	3.51	39.74
55	49.78	23.85	35.85	10.54	1	1	1	0	1	7.05	3.69	40.11
56	55.8	26.76	35.39	12.79	1	0	1	0	1	5.41	4.03	42.35
57	60.1	23.46	33.98	19.14	1	1	1	0	1	6.43	3.95	37.71
58	53.51	20.53	25.37	21.47	1	0	1	1	1	7.09	4.03	41.16
59	52.89	22.12	21.65	9.93	1	0	1	1	2	6.56	3.55	38.6
